# Supplementary material for: A fast and efficient model for real-time anti-tumor drug efficacy test in the clinical setting based on patient-derived tumor xenograft
Source: Research Square preprint supplement (doi:10.21203/rs.3.rs-453208/v1), 2021-05-17
Supplement: Supplementary file 1 [file b7ad018e30a0a1546226d3e4.xlsx]

## Sheet: Supplemental Table 1
Supplemental table 1 Comparison of predictive results of FastPDTX and PDTX to clinical outcomes across various regimens
Abbrevations: OS=osteosarcoma, PC=pancreatic cancer, CRC=colorectal cancer, OC=ovarian cancer, GC=gastric cancer, SS=synovial sarcoma, HCC=hepatocellular carcinoma
Case ID	Cancer Type	Regimen	FastPDTX			PDTX	Clinical Response	Congruous between
			Tumor Cell(%)	Necrotic Cells (%)	Ki67	TGI		FastPDTX / Clinical	FastPDTX / Clinical	FastPDTX / PDTX
050106	OS	Control	0.4	0	0.6
		Apatinib	0.3	0.1	0.7	0.407				N
		Docetaxel+Gemcitabine	0.1	0.1	0.6	0.773	PR	Y	Y	Y
		Etoposide+Ifosfamide	0.4	0.2	0.7	0.867	PR	Y	Y	Y
		Lobaplatin+Docetaxel	0.1	0.05	0.7	0.425				Y
050125	PC	Control	0.2	0.05	0.5
		Gemcitabine+Tegafur	0.3	0	0.1	0.805	CR	Y	Y	Y
		FOLFOX+Irinotecan	0.2	0	0.1	0.6				Y
		Gemcitabine+Capecitabine	0.05	0.4	0.4	0.794				Y
080093	CRC	Control	0.7	0	0.7
		Regorafenib	0.4	0.4	0.7	0.404				N
		Albumin paclitaxel	0.1	0.1	0.1	0.97				Y
		Gemcitabine	0.4	0.1	0.6	0.896				Y
		Savolitinib	0.7	0.05	0.7	0.123				Y
		Irinotecan+Cetuximab	0.1	0	0.2	0.768	SD	Y	Y	Y
		Apatinib	0.5	0	0.8	0.149				Y
		Oxaliplatin+Raltitrexed	0.1	0	0.1	-0.017				N
		Everolimus	0.4	0.1	0.7	0.17				N
0101007	OC	Control	0.2	0.2	0.2
		Lipo-doxorubicin	0.1	0.2	0.1	0.631				Y
		Carboplatin	0.2	0.3	0.2	0.351				N
		Cyclophosphamide	0.2	0	0.1	0.657				Y
		Bevacizumab+Paclitaxel+Lobaplatin	0.2	0.3	0.1	0.473	CR	Y	N	N
110150	GC	Control	0.7	0.1	0.9
		FOLFIRI+Cetuximab	0.3	<5%	0.1	0.826				Y
		Epirubicin+Cisplatin+Leucovorin	0.4	0.1	0.8	0.292				Y
		Albumin paclitaxel+Cisplatin	0.3	0.05	0.4	0.916	SD	Y	Y	Y
		Etoposide+Mitomycin	0.05	0	0.6	0.618				Y
		Everolimus	0.1	0	0.3	0.484				N
110172	PC	Control	0.4	0.2	0.2
		Oxaliplatin	0.2	0	0.2	0.449				Y
		Irinotecan	0.4	0	0.3	0.679				N
		Erlotinib	0.4	0	0.5	0.526				Y
130111	PC	Control	0.08	0	0.7
		Gemcitabine	0.02	0	<5%	0.867	SD	Y	Y	Y
		Erlotinib	0.1	0	0.9	0.292				Y
		Oxaliplatin	<1%	0	0.8	0.41				Y
		Irinotecan	0.3	0.1	0.9	0.474				N
		Mitomycin	0.2	0.1	0.8	0.62				Y
200171	OS	Control	0.2	0	0.05
		Sorafenib	0.25	0	0.03	0.335				Y
		Apatinib	0.5	0.8	0.4	0.301				N
		Albumin paclitaxel	0.1	0	0.08	0.544				Y
		Ifosfamide+Etoposide	0.3	0	0.05	0.777				N
		Docetaxel+Gemcitabine	0.01	0.1	0.03	0.615	SD	Y	Y	Y
		Pemetrexed+Cisplatin	0.4	0.7	0.5	0.417				N
		Methotrexate	0.35	0	0.03	0.127				Y
		Cisplatin+Doxorubicin	0.1	0	0.02	0.451				Y
0212001	SS	Control	0.6	0	0.75
		Apatinib	0.95	0	0.8	0.086				Y
		Arotinib	0.65	0	0.8	0.677				N
		Doxorubicin	0.8	0	0.75	0.738				N
		Lipo-Doxorubicin	0.95	0	0.6	0.682	SD	Y	Y	Y
240154	OS	Control	0.8	0.05	0.5
		Apatinib	0.7	0	0.8	0.45	PD	Y	Y	Y
		Gemcitabine+Docetaxel	0.8	0.2	0.6	0.979	SD	Y	Y	Y
		Doxorubicin+Cyclophosphamide	0.7	0.05	0.1	0.74				Y
		MTX	0.6	0	0.5	0.171				Y
		Etoposide+Ifosfamide	0.3	0	0.1	0.962	PD	N	N	Y
		Etoposide+Irinotecan	0.7	0	0.1	0.968				Y
0104006	OS	Control	0.95	0.3	0.5
		Albumin paclitaxel	0.95	0	0.35	0.642				Y
		Ifosfamide	0.9	0	0.4	0.681				Y
		Docetaxel+Gemcitabine	0.95	0	0.5	0.607				N
		Doxorubicin	0.95	0	0.6	0.165				Y
0403002	HCC	Control	0.6	0	0.7
		Dicycloplatin	0.1	0	0.3	0.925				Y
		Oxaliplatin	0.3	0.1	0.5	0.237				Y
		Leucovorin	0.1	0	0.3	0.474				N
		Dicycloplatin+Gemcitabine	0.1	0	0.1	0.889				Y
		Oxaliplatin+Gemcitabine	0.2	0	0.3	0.409				N
0403005	HCC	Control	0.7	0	0.8
		Dicycloplatin	0.5	0.1	0.8	0.258				N
		Oxaliplatin	0.5	0.05	0.8	0.111				Y
		Leucovorin	0.4	0	0.8	0.06				Y
		Dicycloplatin+Leucovorin	0.8	0.1	0.8	0.31				Y
		Dicycloplatin+Gemcitabine	0.1	0.05	0.05	0.905				Y
		Oxaliplatin+Gemcitabine	0.6	0.05	0.8	0.894				N
0403015	HCC	Control	0.4	0	0.7
		Dicycloplatin	0.3	0	0.8	0.169				Y
		Leucovorin	0.3	0	0.4	0.161				N
		Dicycloplatin+Leucovorin	0.3	0	0.01	0.176				N
		Dicycloplatin+Gemcitabine	0.9	0	0.01	0.708				Y
		Oxaliplatin+Gemcitabine	0.1	0	0.6	0.566				Y
0403024	HCC	Control	0.15	0	0.1
		Dicycloplatin	0.2	0	0.1	0.622				N
		Oxaliplatin	0.1	0	0.1	0.385				Y
		Leucovorin	0.2	0	0.15	0.158				Y
		Dicycloplatin+Leucovorin	0.2	0	<5%	0.672				Y
		Dicycloplatin+Gemcitabine	0.2	0.1	0.2	0.513				N
		Oxaliplatin+Gemcitabine	0.2	0	0.05	0.406				Y
0210037	HCC	Control	0.3	0.1	0.8
		Dicycloplatin	0.1	0	0.05	0.40783				N
		Oxaliplatin	0.1	0.2	0.8	0.283263				Y
		Leucovorin	0.3	0.1	0.7	0.128154				Y
		Dicycloplatin+Leucovorin	0.1	0.05	0.7	0.335274				Y
		Dicycloplatin+Gemcitabine	0.1	0	0.05	0.42315				N
		Oxaliplatin+Gemcitabine	0.7	0.1	0.7	0.0298055				Y
0210040	HCC	Control	0.5	0	0.6
		Oxaliplatin	0.2	0.05	0.5	-0.623773				Y
		Leucovorin	0.1	0	0.4	-0.423847				N
		Oxaliplatin+Gemcitabine	0.5	0	0.6	-0.392894				Y
0108005	HCC	Control	0.9	0.1	0.8
		Dicycloplatin	0.9	0.5	0.8	0.607978				Y
		Oxaliplatin	0.95	0.4	0.7	0.750157				Y
		Fluorouracil	1	0.25	0.8	0.471067				N
		Dicycloplatin+Gemcitabine	0.95	0.2	0.8	0.700202				Y
		Oxaliplatin+Gemcitabine	0.9	0.2	0.8	0.690311				Y
		Dicycloplatin+Fluorouracil	0.95	0.2	0.7	0.621601				Y
		Oxaliplatin+Fluorouracil	0.95	0.2	0.8	0.613779				Y
		Sorafenib	0.9	0.1	0.8	0.611982				N
Positive Predictive Value								11/12=91.7%	10/12=83.3%
Consistency of predictions between FastPDTX and PDTX										65/93=69.9%

## Sheet: Supplemental Table 2
Supplemental Table 2 Positive Predictive Value of FastPDTX in 187 cases
Abbrevations: OS=osteosarcoma, PC=pancreatic cancer, CRC=colorectal cancer, OC=ovarian cancer, GC=gastric cancer, SS=synovial sarcoma, HCC=hepatocellular carcinoma
Serial number	Case ID	Type	FastPDTX检测方案				Clincal responses	Congruous between Clincal and FastPDTX
			Regimens	Tumor cell %	TCNR	Ki67
1	0501025	GC	Control	0.1	0	0.3	SD	Y
			Alb-paclitaxel+Cisplatin	0.3	0.2	0.2
2	0501027	GC	Control	0.3	0	0.1	PR	Y
			Apatinib	0.2	0	0.05
3	0501030	Peritoneal carcinoma	Control	0.1	0	0.8	SD	Y
			Etoposide+Cisplatin	0.2	0	0.2
4	0501033	GC	Control	0.4	0	0.1	PR	Y
			Oxaliplatin+Capecitabine+Epirubicin	0.1	0	0.05
5	0501034	GC	Control	0.2	0	0.1	PR	Y
			Oxaliplatin+Tegafur	0.1	0	0.05
6	0501037	GC	Control	0.4	0	0.1	PR	Y
			Docetaxel+Oxaliplatin+folinate+Fluorouracil	0.35	0	0.05
7	0207002	Metastatic adenocarcinoma in lung	Control	0.8	0	0.5	PR	Y
			Gemcitabine	0.4	0.1	0.1
			Paclitaxel	0.05	0	0.2
8	0105006	Ewing's sarcoma	Control	0.3	0.2	0.8	PD	Y
			Gemcitabine+Docetaxel	0.6	0	0.8
9	0101023	OC	Control	0.1	0	0.1	PR	N
			Bevacizumab+Alb-paclitaxel+Cisplatin	0.6	0	0.15
			Paclitaxel+Lobaplatin+Apatinib	0.5	0	0.15	PR	N
			Lipo-Doxorubicin	0.4	0.3	0.1	SD	Y
10	0101024	OC	Control	0.15	0	0.6	PD	Y
			Paclitaxel+carboplatin	0.35	0.05	0.8
11	0101027	OC	Control	0.2	0	0.7	CR	Y
			Paclitaxel+Lobaplatin+Bevacizumab	0.3	0	0.4
12	0101028	Endometrial carcinoma	Control	0.6	0	0.5	SD	Y
			Lipo-Doxorubicin	0.7	0	0.05
13	0101029	OC	Control	0.3	0.1	0.4	PR	Y
			Lipo-Doxorubicin+carboplatin+Bevacizumab	0.05	0	＜1%
14	0101030	PC	Control	0.2	0	0.2	PD	Y
			Alb-paclitaxel+Tegafur	0.1	0	0.7
15	0101034	OC	Control	0.7	0.3	0.4	SD	Y
			Lipo-Doxorubicin+carboplatin	1	0	0.1
16	0101035	Small cell carcinoma of vagina	Control	0.2	0	0.1	SD	Y
			Docetaxel+Cisplatin	0.6	0.4	0.1
17	0101019	OC	Control	0.4	0	0.7	PR	Y
			Alb-paclitaxel+carboplatin+Bevacizumab	0.7	0.3	0.1
18	0101020	Peritoneal carcinoma	Control	0.1	0	0.8	SD	Y
			Paclitaxel+Lobaplatin	0.4	0.1	0.8
			Epirubicin+cyclophosphamide+Cisplatin	0.2	0.3	0.2	SD	Y
19	0101016	Cervical neuroendocrine carcinoma	Control	0.05	0	0.2	PR	N
			Etoposide+Cisplatin	0.2	0	0.3
20	0101022	GC	Control	0.4	0	0.6	SD	Y
			Alb-paclitaxel+5-Fu	0.1	0	0.3
21	0101032	OC	Control	0.9	0	0.7	PD	Y
			Paclitaxel+carboplatin	0.6	0	0.75
			Paclitaxel+carboplatin+Bevacizumab	0.8	0	0.4	SD	Y
22	0101037	OC	Control	0.9	0	0.05	CR	Y
			Paclitaxel+Lobaplatin+Apatinib	0.8	0	＜1%
23	0501025	GC	Control	0.1	0	0.3	SD	Y
			Alb-paclitaxel+Cisplatin	0.3	0.2	0.2
24	0101117	OC	Control	＞90%	0	0.7	SD	N
			Paclitaxel+carboplatin	0.9	0	0.7
25	0101119	CRC	Control	0.5	0	0.7	SD	Y
			Oxaliplatin+Capecitabine	0.9	0	0.3
26	0109021	SS	Control	0.7	0.1	0.7	SD	Y
			Gemcitabine+Vinorelbine	0.1	0.1	0.1
27	0109023	SCLC	Control	0.5	0	0.8	PD	N
			Irinotecan	＜5%	0	0.1
28	0127002	Hepatoblastoma	Control	0.5	0	0.4	PR	Y
			cyclophosphamide+Nedaplatin+Paclitaxel	0.1	0	0.01
29	0501080	CRC	Control	0.95	0.05	0.4	CR	Y
			Oxaliplatin+folinate+5-FU	0.95	0.7	0.3
30	0101113	PC	Control	0.5	0	0.4	CR	Y
			nimotuzumab+Gemcitabine	0.9	0.2	0.3
31	0101090	PC	Control	0.7	0	0.1	CR	Y
			Gemcitabine+Tegafur	0.3	0.2	0.02
32	0101110	PC	Control	0.7	0	0.8	CR	Y
			Alb-paclitaxel+Gemcitabine	0.9	0	0.1
33	0101084	PC	Control	0.4	0	0.4	CR	Y
			Alb-paclitaxel+Tegafur	0.3	0	0.05
34	0101039	cervical carcinoma	Control	0.8	0.95	0.5	CR	Y
			Docetaxel+Cisplatin	0.6	0.9	0.1
35	0101035	Carcinoma of vagina	Control	0.2	0	0.1	CR	Y
			Docetaxel+Cisplatin	0.6	0.4	0.1
36	0101016	Ovarian neuroendocrine tumor	Control	0.05	0	0.2	PD	Y
			Etoposide+Cisplatin	0.2	0	0.3
37	0101043	OC	Control	0.9	0	0.6	PR	Y
			Paclitaxel+carboplatin+Bevacizumab	0.8	0	0.4
38	0109029	Mucoepidermoid carcinoma	Control	0.5	0.1	0.2	PR	Y
			Paclitaxel+carboplatin+Bevacizumab	0.1	0	0.05
39	0501036	CRC	Control	0.9	0.9	0.9	PR	Y
			Oxaliplatin+Capecitabine	0.6	0.5	0.1
40	0403080	CRC	Control	0.4	0	0.9	CR	Y
			Oxaliplatin+Capecitabine	0.7	0.15	0.7
41	0501050	Liposarcoma	Control	0.6	0.1	0.2	CR	Y
			Dacarbazine	0.4	0.1	0.05
			Doxorubicin	0.4	0.1	0.05
42	0101019	OC	Control	0.4	0	0.7	CR	Y
			carboplatin+Alb-paclitaxel+Bevacizumab	0.7	0.3	0.1
43	0101021	OC	Control	0.7	0	0.5	PR	Y
			carboplatin+Paclitaxel+Bevacizumab	0.25	0.5	0.05
44	0101034	OC	Control	0.7	0.3	0.4	PR	Y
			Lipo-Doxorubicin+carboplatin	1	0	0.1
45	0101080	OC	Control	0.5	0	0.7	PR	Y
			Lipo-Paclitaxel+carboplatin+Bevacizumab	0.3	0	0.6
			Lipo-Doxorubicin+carboplatin	0.4	0	0.4	PR	Y
46	0101091	OC	Control	0.9	0	0.3	PR	Y
			Lipo-Paclitaxel+carboplatin+Bevacizumab	0.7	0	0.1
			Lipo-Doxorubicin+carboplatin	0.3	0	0.05	PR	Y
47	0403077	HCC	Control	50%	0	5%	PR	Y
			Oxaliplatin+folinate+Fluorouracil	50%	30%	5%
48	0501035	GC	Control	80%	0	40%	PR	Y
			Apatinib	40%	0	0.08
			Paclitaxel+Tegafur	50%	90%	＜1%	SD	Y
49	0109073	GC	Control	85%	0	30%	PR	Y
			Oxaliplatin+Tegafur	70%	0	10%
50	0101082	PC	Control	90%	0	10%	PR	Y
			Tegafur+Alb-paclitaxel	90%	10%	5%
51	0101022	GC	Control	0.4	0	0.6	PR	Y
			Alb-paclitaxel+Fluorouracil	10%	0	30%
52	0101051	CRC	Control	0.5	0.05	0.3	SD	Y
			Oxaliplatin+Bevacizumab+Capecitabine	20%	10%	10%
			Irinotecan+folinate+Fluorouracil	90%	30%	20%	SD	Y
53	0101067	CRC	Control	60%	10%	10%	PR	Y
			Irinotecan+folinate+Fluorouracil	50%	50%	8%
			Raltitrexed+Irinotecan+Bevacizumab	50%	80%	5%	PR	Y
54	0101074	cervical carcinoma	Control	80%	0	20%	SD	Y
			Cisplatin+Paclitaxel	50%	0	5%
55	0101078	PC	Control	80%	0	10%	PD	Y
			Tegafur+Alb-paclitaxel	80%	0	10%
56	0101095	Endometrial carcinoma	Control	70%	0	40%	SD	Y
			Docetaxel+Gemcitabine	40%	0	8%
57	0101103	PC	Control	90%	20%	20%	PR	Y
			Gemcitabine+Tegafur	80%	40%	30%
58	0101138	HCC	Control	95%	0	30%	PR	Y
			Anlotinib	95%	60%	5%
59	0104023	OS	Control	70%	0	40%	PR	Y
			Ifosfamide+Etoposide	50%	>90%	10%
60	0104025	OS	Control	80%	0	40%	PD	N
			Docetaxel+Gemcitabine	100%	60%	30%
61	0104033	Sarcoma	Control	80%	10%	20%	PR	Y
			Doxorubicin	95%	0	3%
62	0104035	Sarcoma	Control	95%	2%	30%	SD	N
			Ifosfamide	95%	3%	60%
63	0104039	OS	Control	90%	0	5%	PD	Y
			Ifosfamide+Etoposide	80%	0	6%
64	0105015	GC	Control	90%	0	40%	SD	Y
			Alb-paclitaxel+Tegafur	60%	0	20%
65	0105017	GC	Control	10%	0	20%	PD	N
			Paclitaxel+carboplatin+Bevacizumab	40%	0	10%
66	0108035	HCC	Control	70%	0	10%	SD	N
			Oxaliplatin+Apatinib	60%	0	10%
67	0108044	Cholangiocarcinoma	Control	100%	40%	20%	PD	N
			Alb-paclitaxel+Apatinib	90%	60%	5%
68	0108047	PC	Control	80%	2%	30%	SD	Y
			Gemcitabine+Alb-paclitaxel	100%	20%	10%
69	0109024	Sarcoma	Control	60%	0	10%	PR	Y
			Alb-paclitaxel	30%	0	3%
70	0109025	OS	Control	40%	0	30%	PR	Y
			Anlotinib	45%	0	10%
71	0109049	GC	Control	40%	0	40%	PR	Y
			Oxaliplatin+Tegafur	30%	0	20%
72	0109061	GC	Control	20%	0	20%	CR	Y
			Oxaliplatin+Tegafur	80%	0	10%
73	0109070	CRC	Control	80%	0	50%	PR	Y
			Bevacizumab+Capecitabine	>90%	0	40%
74	0109075	GC	Control	80%	0	10%	PD	Y
			Oxaliplatin+Tegafur	70%	0	20%
75	0112005	Nephroblastoma	Control	70%	5%	10%	PR	Y
			Doxorubicin+vincristine+Gentamicin	80%	30%	5%
76	0112009	Hepatoblastoma	Control	80%	0	10%	CR	Y
			Nedaplatin+Irinotecan+Fluorouracil+Vindesin	50%	0	1%
77	0112011	Sarcoma	Control	50%	0	30%	CR	Y
			vincristine+Gentamicin+cyclophosphamide+Pirarubicin	90%	60%	10%
78	0112018	Nephroblastoma	Control	95%	0	15%	PR	Y
			vincristine+cyclophosphamide+Doxorubicin+Etoposide	100%	0	4%
79	0112020	Sarcoma	Control	90%	0	30%	PR	Y
			ifosfamide+carboplatin+Etoposide	60%	0	10%
80	0113006	BRCA	Control	50%	0	5%	PR	Y
			Lapatinib+Capecitabine	10%	0	2%
81	0114002	OC	Control	95%	20%	80%	PR	Y
			carboplatin+Docetaxel	50%	2%	10%
82	0115001	Sarcoma	Control	50%	0	30%	SD	Y
			vincristine+Etoposide+ifosfamide	70%	2%	10%
83	0119002	OC	Control	100%	2%	50%	PR	Y
			Doxorubicin	85%	5%	20%
84	0120002	GC	Control	95%	10%	40%	PR	Y
			Alb-paclitaxel+Tegafur	100%	5%	5%
			Oxaliplatin+Capecitabine	95%	10%	30%
85	0120003	GC	Control	90%	0	80%	PD	N
			Oxaliplatin+Tegafur	80%	0	20%
86	0125003	HCC	Control	40%	0	40%	SD	Y
			Lovatinib	50%	2%	10%
87	0127004	Hepatoblastoma	Control	70%	30%	10%	PR	Y
			Fluorouracil+Nedaplatin+Pirarubicin+Paclitaxel	60%	30%	5%
88	0127007	Hepatoblastoma	Control	60%	5%	20%	SD	Y
			Pirarubicin+carboplatin+ifosfamide+Etoposide	50%	15%	5%
89	0201002	OC	Control	70%	0	30%	PR	Y
			ifosfamide	70%	0	8%
90	0202018	PC	Control	80%	0	3%	CR	N
			Alb-paclitaxel	70%	1%	5%
91	0202030	PC	Control	50%	0	10%	SD	Y
			Oxaliplatin	80%	0	2%
			Raltitrexed	60%	0	1%
92	0202041	PC	Control	40%	0	40%	SD	Y
			Alb-paclitaxel	5%	0	5%
93	0205006	OC	Control	40%	＜1%	50%	PR	Y
			Paclitaxel	60%	25%	60%
94	0205011	OC	Control	80%	0	20%	SD	N
			carboplatin	80%	0	40%
			Alb-paclitaxel	90%	0	60%
95	0210055	HCC	Control	80%	0	60%	CR	N
			Oxaliplatin+Capecitabine	60%	0.05	60%
96	0210091	HCC	Control	10%	0	70%	PR	Y
			Anlotinib	10%	5%	50%
97	0210093	HCC	Control	70%	0	50%	PD	N
			Lovatinib	60%	0	＜5%
98	0210097	HCC	Control	100%	50%	70%	PD	N
			Lovatinib	30%	0	40%
99	0210098	HCC	Control	20%	0	90%	PD	N
			Capecitabine+ Oxaliplatin	40%	5%	40%
			Lovatinib	30%	0	70%
100	0210120	HCC	Control	20%	0	3%	PR	Y
			Sorafenib	60%	10%	5%
101	0210123	HCC	Control	20%	0	3%	CR	Y
			Apatinib	50%	90%	5%
102	0210127	HCC	Control	40%	10%	30%	SD	N
			Lovatinib	70%	15%	30%
103	0210134	Cholangiocarcinoma	Control	50%	0	30%	PR	Y
			Anlotinib	50%	20%	20%
104	0210136	HCC	Control	10%	5%	5%	SD	Y
			Regorafenib	20%	20%	20%
105	0210138	CRC	Control	60%	10%	20%	PR	Y
			Regorafenib	80%	20%	30%
106	0210139	HCC	Control	40%	0	15%	PD	Y
			Lovatinib	70%	0	50%
107	0210144	Cholangiocarcinoma	Control	40%	10%	70%	PD	N
			Sorafenib+Everolimus	50%	20%	3%
108	0210146	HCC	Control	10%	10%	20%	PD	N
			Lovatinib+Lenalidomide	60%	20%	10%
109	0210148	HCC	Control	20%	0	10%	CR	Y
			Anlotinib	50%	30%	5%
110	0210151	HCC	Control	90%	10%	50%	PD	N
			Lovatinib	50%	60%	2%
111	0210156	HCC	Control	20%	0	5%	PR	N
			Lovatinib	30%	3%	8%
112	0210165	HCC	Control	50%	0	25%	SD	Y
			Lovatinib	40%	0	1%
113	0210173	HCC	Control	50%	15%	5%	PD	N
			Lovatinib	30%	25%	10%
114	0210174	HCC	Control	20%	0	7%	PR	Y
			Lovatinib	70%	0	3%
115	0210177	HCC	Control	70%	0	60%	PR	Y
			Apatinib	80%	20%	50%
116	0210182	PC	Control	70%	1%	30%	SD	Y
			Anlotinib	80%	20%	25%
117	0210183	HCC	Control	30%	0	20%	PD	Y
			Lovatinib	50%	5%	30%
118	0210196	HCC	Control	40%	50%	20%	SD	Y
			Lovatinib	2%	80%	10%
119	0210198	Cholangiocarcinoma	Control	20%	0	10%	SD	Y
			Apatinib	40%	10%	10%
120	0210251	Carcinoma of gallbladder	Control	>90%	0	40%	SD	Y
			Capecitabine+Oxaliplatin	100%	5%	10%
121	0210260	HCC	Control	60%	30%	10%	PR	N
			Apatinib	70%	30%	15%
122	0212011	bone tumour	Control	40%	0	30%	PR	Y
			Cisplatin	30%	0	20%
			methotrexate	30%	0	10%
123	0212015	OS	Control	30%	10%	90%	PD	N
			methotrexate	80%	10%	40%
124	0212022	OS	Control	100%	15%	60%	SD	Y
			ifosfamide	20%	1%	30%
125	0212023	bone tumour	Control	40%	40%	30%	PR	Y
			Doxorubicin	40%	30%	10%
			methotrexate	60%	20%	10%
			Cisplatin	30%	20%	20%
126	0216001	Bladder cancer	Control	80%	10%	2%	PR	N
			Alb-paclitaxel+Cisplatin	60%	5%	2%
127	0217002	Periampullary carcinoma	Control	70%	1%	60%	PD	N
			Gemcitabine+Oxaliplatin	55%	0	35%
128	0217007	Carcinoma of gallbladder	Control	80%	0	20%	SD	Y
			Gemcitabine+Capecitabine	＞90%	20%	10%
129	0220001	HCC	Control	80%	0	50%	PR	Y
			Apatinib	50%	15%	40%
130	0302009	CRC	Control	60%	0	5%	CR	Y
			Oxaliplatin+folinate+Fluorouracil	60%	10%	<1%
131	0302012	CRC	Control	70%	0	60%	CR	Y
			Irinotecan+folinate+Fluorouracil+Bevacizumab	30%	0	10%
132	0302026	CRC	Control	95%	1%	85%	PR	Y
			Irinotecan+Oxaliplatin+Fluorouracil+folinate+Bevacizumab	90%	0	35%
133	0403106	Carcinoma of gallbladder	Control	80%	0	10%	PR	Y
			Gemcitabine+Oxaliplatin	70%	0	2%
134	0403108	HCC	Control	80%	5%	20%	CR	Y
			Lovatinib	90%	20%	10%
135	0403111	HCC	Control	50%	2%	2%	PD	N
			Apatinib	20%	80%	5%
136	0403115	HCC	Control	30%	5%	10%	CR	Y
			Apatinib	20%	15%	15%
137	0403118	HCC	Control	30%	0	5%	SD	Y
			Bevacizumab+rapamycin	40%	30%	<5%
			Sorafenib	50%	20%	<5%	PR	Y
138	0403121	HCC	Control	60%	0	20%	CR	Y
			Sorafenib	5%	0	2%
139	0403127	HCC	Control	>90%	<1%	60%	CR	Y
			Apatinib	50%	10%	40%
140	0403129	Carcinoma of gallbladder	Control	70%	40%	20%	PR	Y
			Lovatinib	80%	30%	10%
141	0403144	HCC	Control	70%	20%	5%	PD	Y
			Lovatinib	80%	10%	5%
142	0403203	HCC	Control	80%	5%	70%	PR	Y
			Apatinib	90%	0	50%
143	0403204	HCC	Control	70%	10%	20%	PR	Y
			Oxaliplatin+Tegafur	50%	20%	10%
144	0403205	HCC	Control	100%	0	30%	PD	N
			Apatinib	80%	40%	1%
145	0403208	HCC	Control	80%	10%	30%	PR	Y
			rapamycin+Bevacizumab	70%	5%	10%
146	0403210	HCC	Control	100%	10%	50%	SD	Y
			Regorafenib	40%	0	1%
			Apatinib	50%	0	1%
147	0403212	HCC	Control	100%	0	20%	PR	Y
			Sorafenib	80%	10%	15%
148	0406011	GC	Control	95%	0	30%	PR	Y
			Oxaliplatin+Tegafur	90%	0	20%
149	0406013	CRC	Control	40%	2%	75%	PR	Y
			Oxaliplatin+Bevacizumab	50%	50%	10%
150	0406016	CRC	Control	40%	90%	30%	CR	Y
			Oxaliplatin+Bevacizumab	40%	50%	10%
151	0406027	Stromal tumor	Control	60%	0	30%	PR	Y
			Regorafenib	80%	0	10%
152	0406030	CRC	Control	90%	20%	80%	PR	Y
			Irinotecan+Raltitrexed	50%	50%	20%
153	0406031	CRC	Control	30%	0	50%	SD	Y
			Oxaliplatin+Capecitabine	80%	0	10%
154	0408001	esophageal cancer	Control	80%	0.5	40%	PR	Y
			Docetaxel+5-Fu+Cisplatin	50%	80%	10%
155	0501056	GC	Control	40%	0	30%	SD	Y
			Docetaxel+Oxaliplatin+Fluorouracil+folinate	80%	50%	5%
156	0501058	GC	Control	80%	5%	1%	CR	N
			Oxaliplatin+Capecitabine	80%	0	1%
157	0501059	Lung Cancer	Control	70%	0	30%	PR	Y
			ifosfamide	50%	40%	10%
158	0501064	CRC	Control	90%	5%	10%	CR	Y
			Apatinib	40%	20%	15%
159	0501067	CRC	Control	70%	0	10%	CR	Y
			Sunitinib	80%	0	3%
160	0501068	GC	Control	70%	2%	40%	CR	Y
			Lipo-Paclitaxel+Tegafur	60%	1%	10%
161	0501071	GC	Control	90%	0	15%	CR	Y
			Oxaliplatin+Tegafur	80%	0	10%
162	0501081	GC	Control	70%	0	10%	CR	Y
			Alb-paclitaxel+Tegafur	80%	0	1%
163	0501082	GC	Control	90%	0	30%	PR	Y
			Paclitaxel+Tegafur	100%	0	10%
164	0501085	GC	Control	70%	0	5%	CR	N
			Imatinib	60%	<1%	8%
165	0501088	GC	Control	80%	10%	10%	PR	Y
			Alb-paclitaxel+Tegafur	90%	0	3%
166	0501090	GC	Control	80%	0	20%	PD	Y
			Oxaliplatin+Tegafur	80%	0	20%
167	0501091	CRC	Control	80%	5%	5%	PR	N
			Oxaliplatin+Capecitabine	70%	0	5%
168	0501092	GC	Control	100%	0	10%	PR	Y
			Irinotecan+Tegafur	90%	0	1%
169	0501095	GC	Control	80%	0	20%	CR	Y
			Paclitaxel+Tegafur	80%	20%	10%
170	0501096	GC	Control	30%	0	5%	PD	N
			Irinotecan+Tegafur	30%	10%	2%
171	0501097	GC	Control	100%	0	40%	PR	Y
			Alb-paclitaxel+Tegafur	90%	10%	20%
172	0501107	GC	Control	90%	0	80%	CR	Y
			Oxaliplatin+Tegafur	<5%	0	5%
173	0501112	Sarcoma	Control	80%	0	30%	SD	Y
			Docetaxel+Gemcitabine	90%	20%	30%
174	0501113	GC	Control	60%	0	10%	PR	Y
			Oxaliplatin+Tegafur	70%	0	5%
175	0501115	GC	Control	>90%	0	10%	CR	Y
			Irinotecan+Fluorouracil	>90%	0	5%
176	0501116	GC	Control	60%	5%	70%	CR	Y
			Docetaxel+Oxaliplatin+Fluorouracil	80%	0	20%
177	0501117	GC	Control	80%	0	20%	SD	Y
			Irinotecan+Tegafur	90%	0	2%
178	0501118	GC	Control	100%	0	10%	CR	Y
			Oxaliplatin+Tegafur	70%	0	5%
179	0501120	GC	Control	90%	0	50%	CR	Y
			Oxaliplatin+Capecitabine	60%	0	20%
180	0501121	GC	Control	90%	0	40%	CR	Y
			Alb-paclitaxel+Tegafur	80%	0	30%
181	0501126	Sarcoma	Control	80%	0	50%	CR	Y
			Dacarbazine	70%	0	20%
182	0501129	HCC	Control	100%	5%	70%	PR	Y
			Regorafenib	80%	40%	60%
183	0501132	CRC	Control	80%	0	80%	PR	Y
			Lovatinib	90%	10%	50%
184	0601001	CRC	Control	80%	5%	10%	PR	N
			Irinotecan+Fluorouracil	50%	10%	10%
185	0901003	Hepatoblastoma	Control	80%	0	30%	CR	Y
			Fluorouracil+Cisplatin+Pirarubicin+Vindesin	60%	1%	10%
186	0403053	HCC	Control	40%	10%	40%	PD	N
			Oxaliplatin+Tegafur	90%	80%	90%
187	0403070	HCC	Control	30%	0	10%	PR	Y
			Oxaliplatin+ folinate+ Fluorouracil	60%	28%	10%
			Regorafenib	10%	20%	1%	PR	Y
Positive Predictive Value								163/198=82.3%

## Sheet: Supplemental Table 3
Supplemental Table 3 Positive Predictive Value of PDTX in 28 cases
Abbrevations: OS=osteosarcoma, PC=pancreatic cancer, CRC=colorectal cancer, OC=ovarian cancer, GC=gastric cancer, SS=synovial sarcoma, HCC=hepatocellular carcinoma
Serial number	Case ID	Cancer Type	PDTX Modeling		Clinical Responses	PDTX Congruous with Clincal
			Regimens	TGI
1	080093	CRC	Irinotecan+Cetuximab	0.7682	SD	Y
2	A10013	OC	Albumin-paclitaxel	0.806	PR	Y
3	A11016	PC	Oxaliplatin	0.008	PD	Y
4	A11017	CRC	Oxaliplatin+folinate+5-fu+Cetuximab	0.925	PR	Y
5	050106	OS	Docetaxel+Gemcitabine	0.773	PR	Y
			Ifosfamide+Etoposide	0.867	PR	Y
6	120108	CRC	Irinotecan+Raltitrexed+Bevacizumab	0.508	PD	Y
7	130111	PC	Gemcitabine	0.867	SD	Y
8	150110	HCC	Regorafenib	0.647	PR	Y
9	050125	PC	Gemcitabine+Tegafur	0.805	CR	Y
10	130140	fallopian tube carcinoma	Paclitaxel+Lobaplatin	0.928	SD	Y
11	A19057	esophageal cancer	Irinotecan+Nedaplatin	0.419	SD	N
12	110150	GC	Albumin-paclitaxel+Cisplatin	0.916	SD	Y
13	110160	PC	Albumin-paclitaxel+Tegafur	0.642	PR	Y
			Gemcitabine	0.701	SD	Y
			Cisplatin	0.643
14	250161	CRC	Oxaliplatin+Capecitabine+Bevacizumab	0.797	PR	Y
15	110164	OC	Albumin-paclitaxel+Cisplatin	0.453	SD	N
16	0208002	OS	cyclophosphamide+Etoposide	0.46	SD	N
			Gemcitabine	0.395
			Gemcitabine+Docetaxel	0.935	SD	Y
17	0212001	SS	Lipo-doxorubicin	0.682	SD	Y
18	0101005	OC	Paclitaxel+Lobaplatin+Olaparib	76.2%	SD	Y
19	0101006	CRC	Irinotecan+Bevacizumab	0.886	SD	Y
20	0101007	OC	Paclitaxel+Lobaplatin+Bevacizumab	0.4734	CR	N
21	200159	OS	Albumin-paclitaxel	0.641	SD	Y
22	200171	OS	Gemcitabine+Docetaxel	0.615	SD	Y
23	240154	OS	Apatinib	0.45	PD	Y
			Etoposide+Ifosfamide	0.962	PD	N
			Gemcitabine+Docetaxel	0.979	SD	Y
24	0212001	SS	Doxorubicin	0.738	SD	Y
25	0104010	OS	Docetaxel+Gemcitabine	0.87	SD	Y
26	0104003	OS	Docetaxel+Gemcitabine	0.927	SD	Y
27	0104002	OS	Ifosfamide+Etoposide	0.371	SD	N
28	0104011	OS	Ifosfamide	0.717	SD	Y
Positive Predictive Value						27/33=81.8%
